# Supplementary material
Source: Royal Society of Chemistry journal article supplement (doi:10.1039/d6ce00378h)
Supplement: d6ce00378h1.pdf [file d6ce00378h1.pdf]

***Electronic Supplementary Information (ESI)***

**Controlled synthesis of porous nano/micro-sized metal-organic frameworks with superior capacity and selectivity for dye adsorption from aqueous solution**

**Zhao-Peng Qi<sup>a,b,\*</sup>, Ji-Min Yang<sup>c,\*</sup>**

<sup>a</sup> *School of Chemistry and Chemical Engineering, Key Laboratory of Inorganic Functional Materials, Huangshan University, Huangshan 245041, China. E-mail: zhaopengqi@hsu.edu.cn*

<sup>b</sup> *State Key Laboratory of Coordination Chemistry, Nanjing University, Nanjing 210023, China*

<sup>c</sup> *School of Chemistry and Chemical Engineering, Linyi University, Linyi 276005, China. E-mail: yangjimin@lyu.edu.cn*

**Table S1.** Characteristic parameters of the adsorption of MB by NMOF **1** samples.

|                                               | Model               | Parameters                                                       | NMOF <b>1a</b> | NMOF <b>1b</b> |
|-----------------------------------------------|---------------------|------------------------------------------------------------------|----------------|----------------|
| Adsorption kinetics                           | Pseudo-first-order  | $q_{e,Exp}$ (mg g <sup>-1</sup> )                                | 118.7          | 159.5          |
|                                               |                     | $q_{e,Cal}$ (mg g <sup>-1</sup> )                                | 51.2           | 5.3            |
|                                               |                     | $k_1$ (min <sup>-1</sup> )                                       | 0.028          | 0.103          |
|                                               |                     | $R^2$                                                            | 0.967          | 0.823          |
|                                               | Pseudo-second-order | $q_{e,Exp}$ (mg g <sup>-1</sup> )                                | 118.7          | 159.5          |
|                                               |                     | $q_{e,Cal}$ (mg g <sup>-1</sup> )                                | 99.5           | 159.7          |
| $k_2$ (g mg <sup>-1</sup> min <sup>-1</sup> ) |                     | 6.48×10 <sup>-3</sup>                                            | 0.0632         |                |
|                                               | $R^2$               | 0.995                                                            | 1              |                |
| Adsorption isotherms                          | Temkin              | $A$ (L g <sup>-1</sup> )                                         | 16.43          | 7323.3         |
|                                               |                     | $B$                                                              | 77.82          | 50.73          |
|                                               |                     | $R^2$                                                            | 0.980          | 0.931          |
|                                               | Freundlich          | $N$                                                              | 6.05           | 10.9           |
|                                               |                     | $k_f$ (mg g <sup>-1</sup> (L mg <sup>-1</sup> ) <sup>1/n</sup> ) | 261.3          | 443.0          |
|                                               |                     | $R^2$                                                            | 0.958          | 0.922          |
|                                               | Langmuir            | $q_{m,Exp}$ (mg g <sup>-1</sup> )                                | 652            | 738            |
|                                               |                     | $q_{m,Cal}$ (mg g <sup>-1</sup> )                                | 685            | 730            |
|                                               |                     | $b$ (L mg <sup>-1</sup> )                                        | 0.087          | 0.749          |
|                                               |                     | $R^2$                                                            | 0.995          | 0.998          |
| $\Delta G$ (kJ mol <sup>-1</sup> )            |                     | -25.4                                                            | -30.7          |                |

**Table S2.** Adsorption capacities for MB by different porous materials.

| Material       | Adsorption Capacity (mg g <sup>-1</sup> ) | Ref.      |
|----------------|-------------------------------------------|-----------|
| NMOF <b>1b</b> | 738                                       | This work |
| MIL-235        | 252                                       | 37        |
| MIL-101        | 195                                       | 36        |
| UiO-66-P       | 91.1                                      | 26        |
| PZS nanotubes  | 69.2                                      | 38        |
| FMAAs          | 40                                        | 39        |
| HKUST-1        | 15.3                                      | 40        |

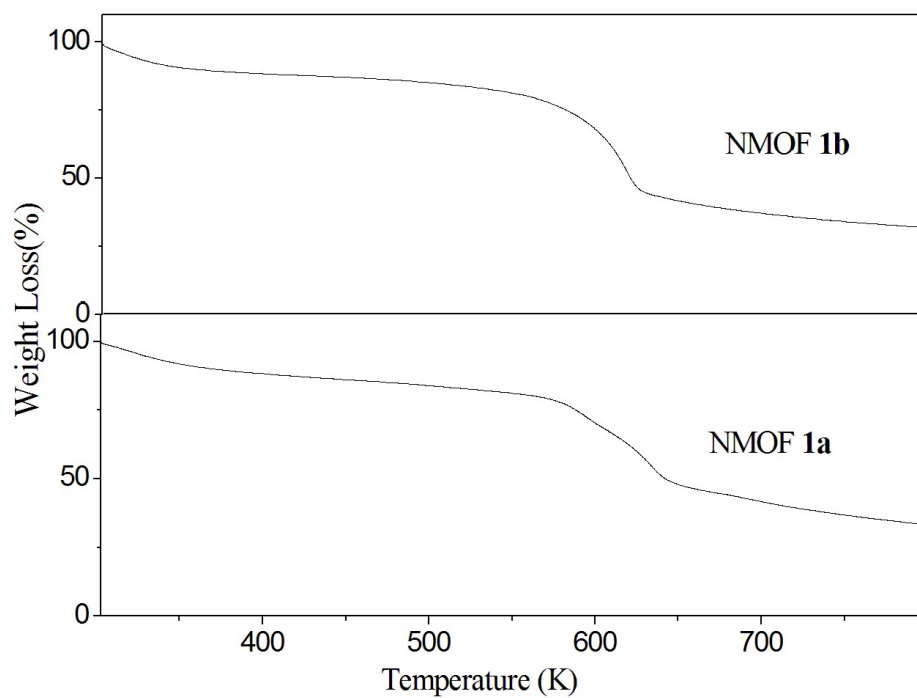

**Fig. S1.** TG curves of NMOF **1a** and NMOF **1b**.

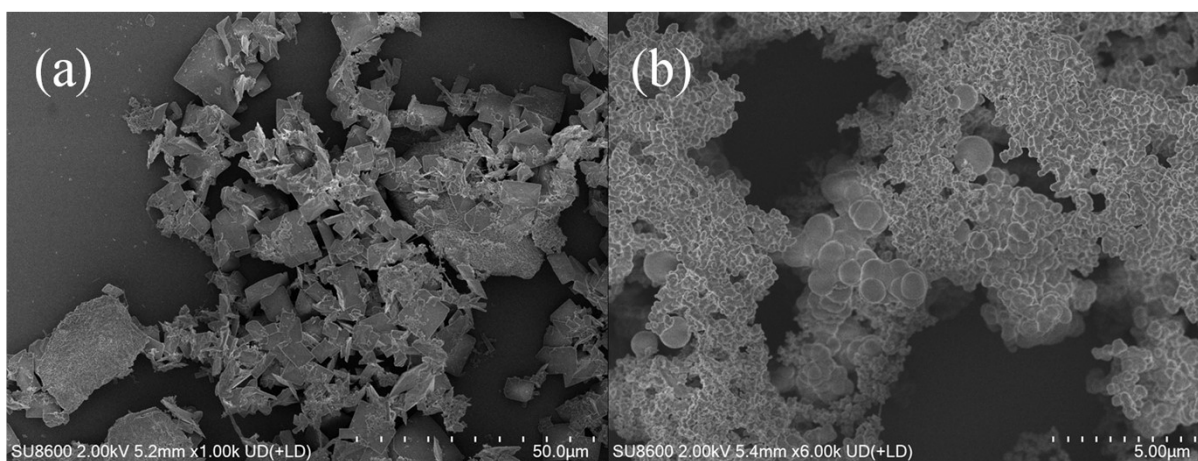

**Fig. S2.** SEM images of NMOF **1a** (a) and NMOF **1b** (b) when the volume ratio decreases to 14:6.

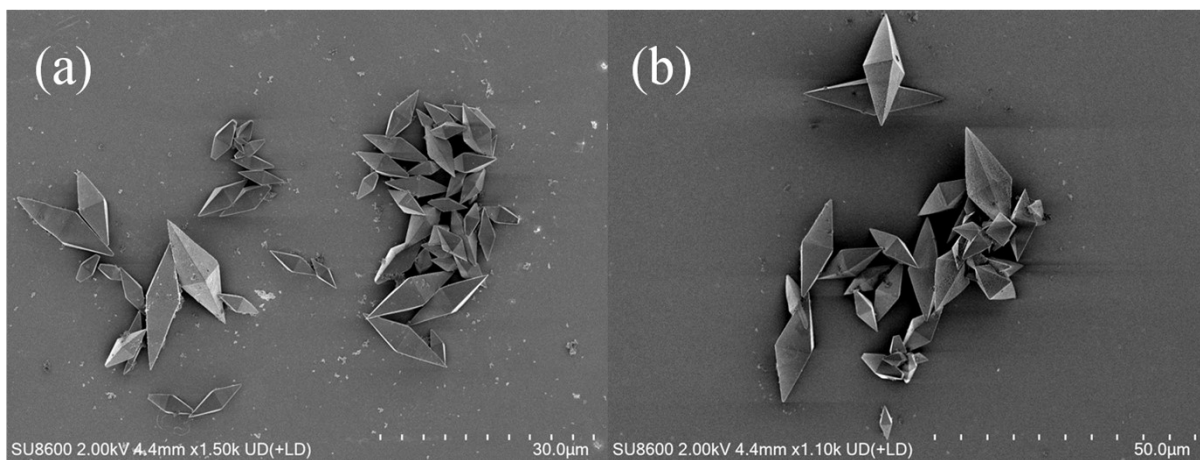

**Fig. S3.** SEM images of NMOF **1b** synthesized with 0.5 mL aqueous ammonia (a) and 1.0 mL aqueous ammonia.

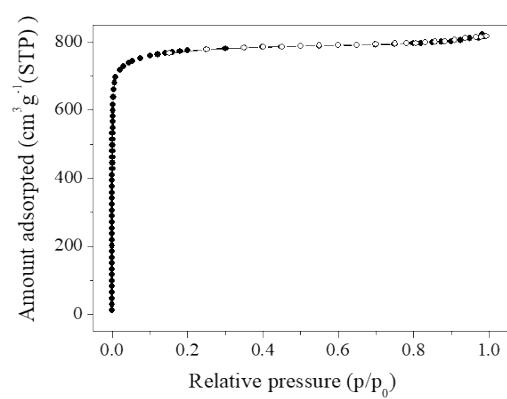

**Fig. S4** Adsorption and desorption isotherms of N<sub>2</sub> at 77 K for NMOF **1b** synthesized from the different baths.

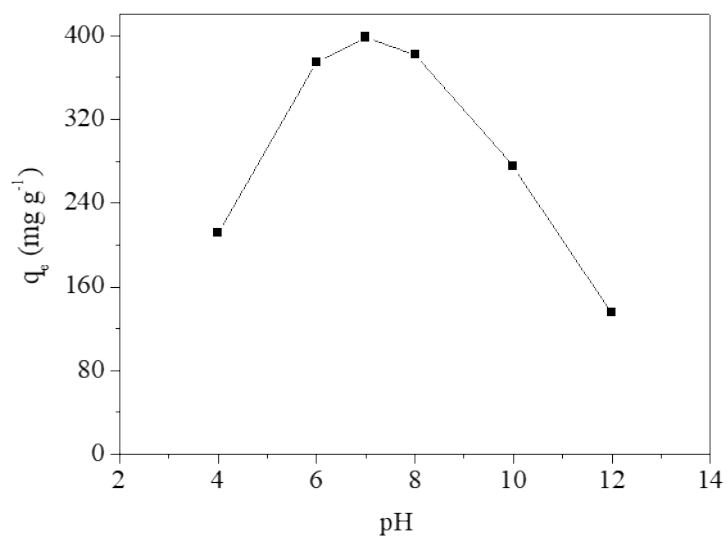

**Fig. S5.** Effect of pH on MB adsorption on the NMOF1b microcrystals.

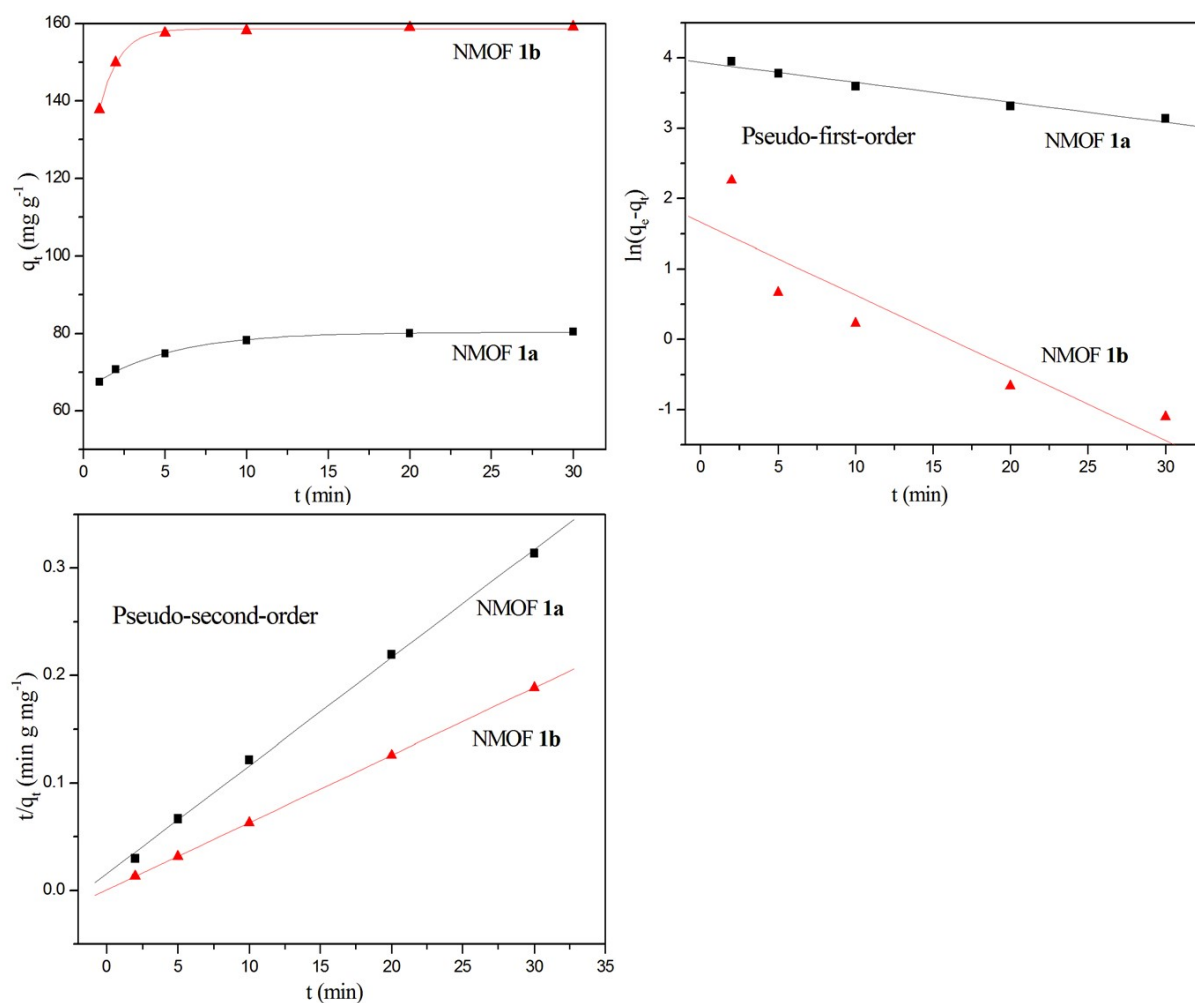

**Fig. S6.** The adsorption kinetic curves for NMOF **1a** and NMOF **1b** as a function of time, and pseudo-first-order and pseudo-second-order model.

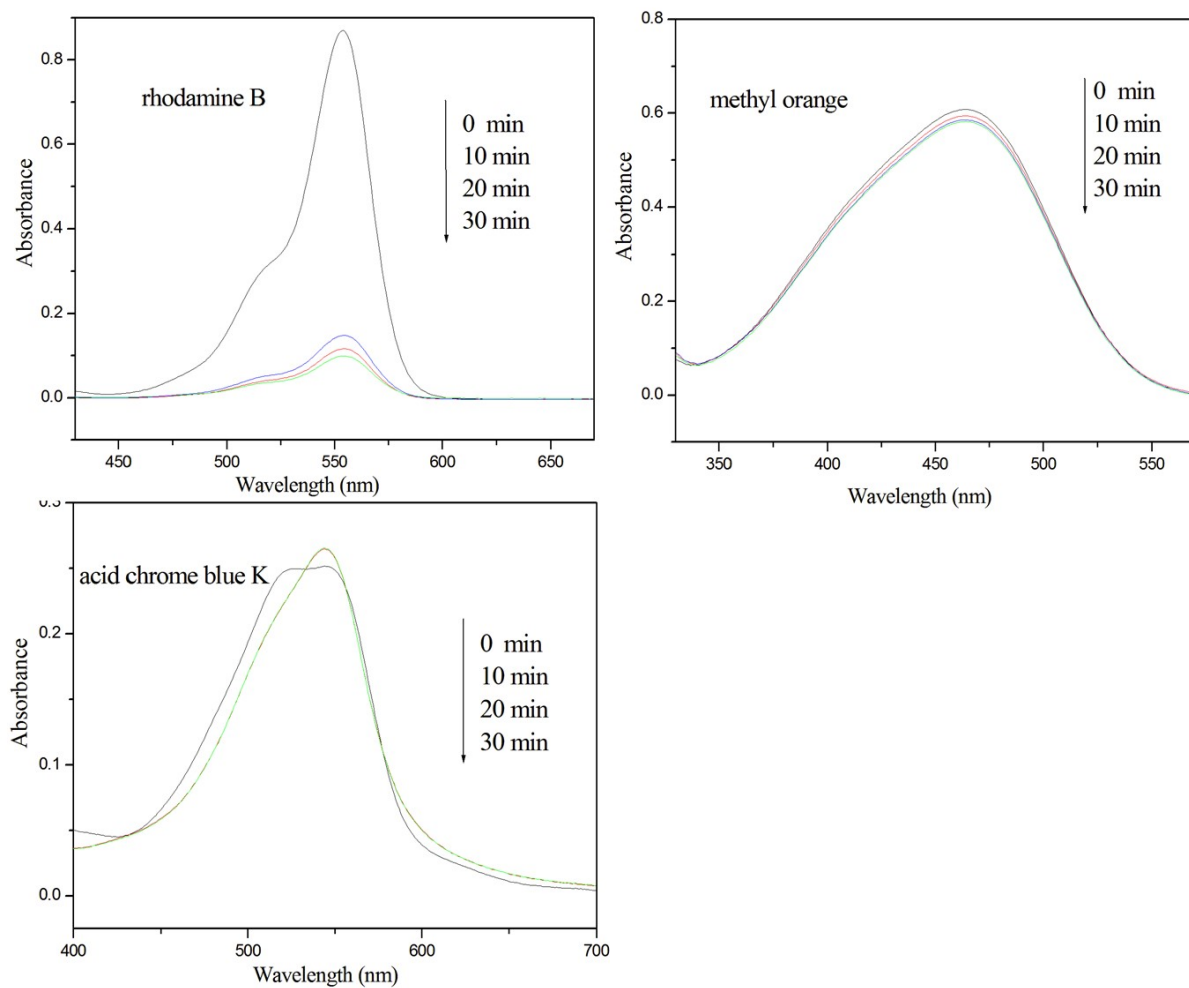

**Fig. S7.** UV-Vis spectra of aqueous solution of the NMOF **1b** sample with different dyes at different time intervals: rhodamine B, methyl orange, and acid chrome blue K.

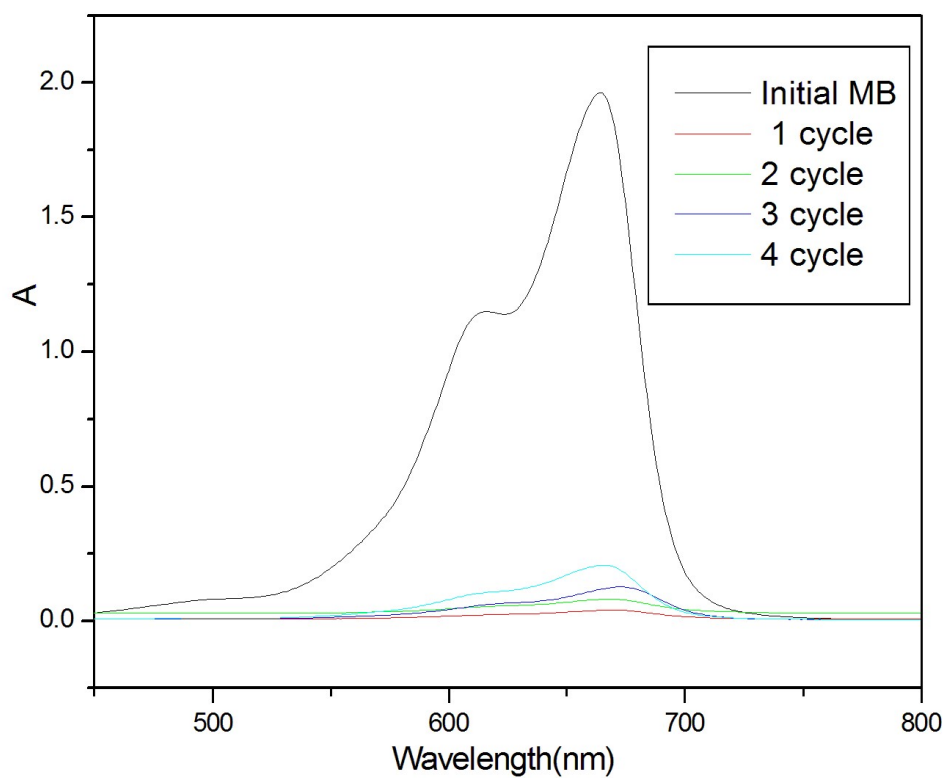

**Fig. S8.** UV-Vis spectra of MB adsorbed by the NMOF **1b** sample for four consecutive adsorption- desorption cycles.
